# Supplementary material for: Lipid Process Markers of Durum Wheat Debranning Fractions
Source: MDPI journal article supplement (doi:10.3390/foods12163036), 2023-08-12

# Lipid Process Marker of Durum Wheat Debranning Fractions

Silvia Marzocchi <sup>1,\*</sup>, Maria Cristina Messia <sup>2</sup>, Emanuele Marconi <sup>3</sup>,  
Maria Fiorenza Caboni <sup>1,4</sup>, Federica Pasini <sup>1,4</sup>

**Figure S1.** Chromatogram of the tocochromanols of I-WG sample. Peaks: (1)  $\alpha$ -tocopherol; (2)  $\alpha$ -tocotrienol; (3)  $\beta$ -tocopherol; (4)  $\gamma$ -tocopherol; (5)  $\beta$ -tocotrienol.

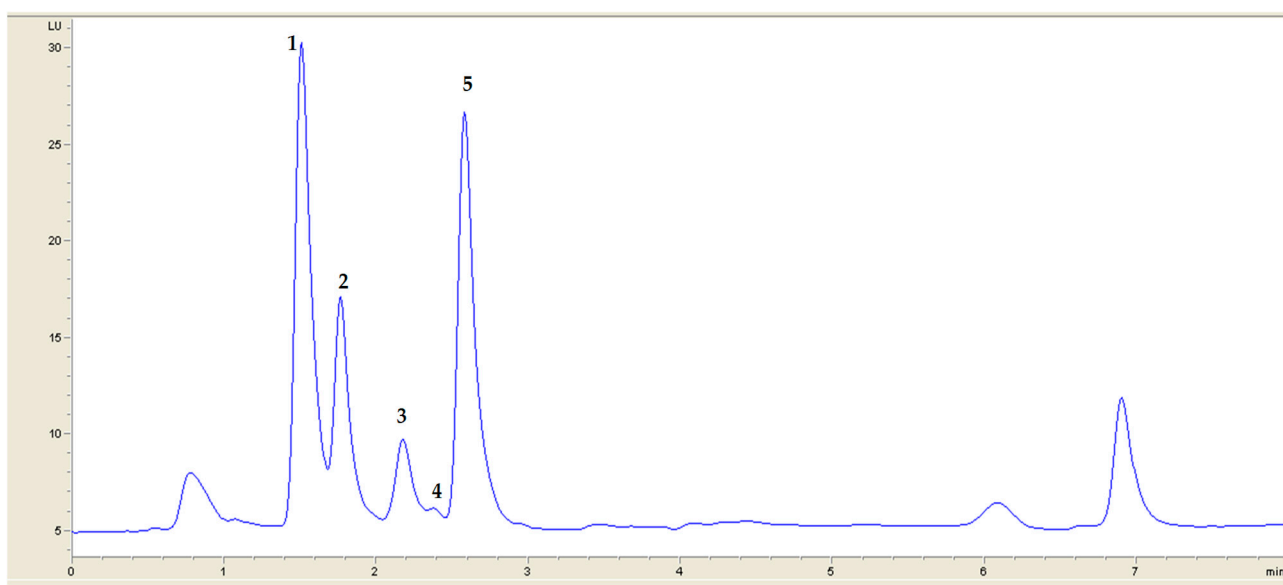

**Figure S2.** Chromatogram of the sterols of C-WG sample. Peaks: IS:  $5\alpha$ -cholestan- $3\beta$ -ol (Internal Standard); (1) Campesterol; (2) Campestanol; (3) Stigmasterol; (4)  $\beta$ -sitosterol; (5) Sitostanol; (6)  $\Delta^5$ -Avenasterol; (7) Avenastanol; (8)  $\Delta^7$ -avenasterol.

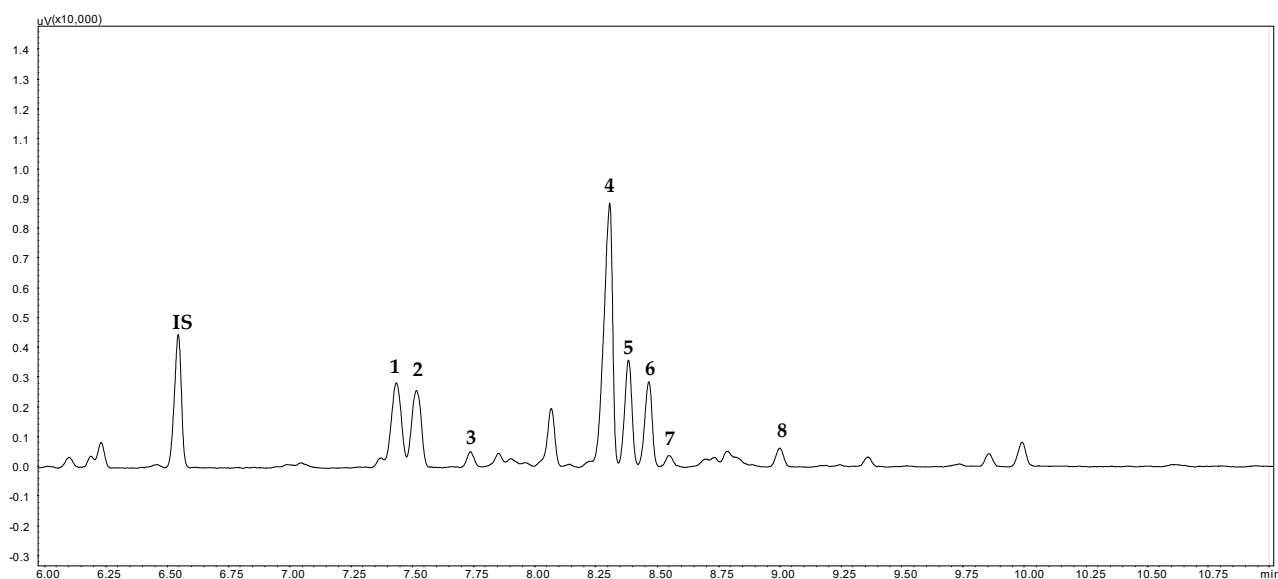

Supplement: s1 [file s1]
